# Supplementary material
Source: PubMed Central journal article supplement (PMC7965303)
Supplement: 4127_table.pdf [file 4127_table.pdf]

**On-line Table: Baseline patient characteristics<sup>a</sup>**

|                                                     | Kyphoplasty<br>(n = 191) <sup>b</sup> | Vertebroplasty<br>(n = 190) <sup>b</sup> |
|-----------------------------------------------------|---------------------------------------|------------------------------------------|
| Denominator (No.)                                   | 191                                   | 190                                      |
| Age (yr) (mean) (SD)                                | 75.5 (10.3)                           | 75.7 (10.5)                              |
| Weight (kg) (mean) (SD)                             | 69.9 (18.2)                           | 72.7 (19.5)                              |
| Height (cm) (mean) (SD)                             | 162 (11.0)                            | 164 (10.2)                               |
| Body mass index (mean) (SD)                         | 26.5 (5.8)                            | 27.0 (6.3)                               |
| Female (m) (%)                                      | 151 (79.1)                            | 144 (75.8)                               |
| Etiology (m) (%)                                    |                                       |                                          |
| Primary osteoporosis                                | 179 (93.7)                            | 172 (90.5)                               |
| Secondary osteoporosis                              | 12 (6.3)                              | 18 (9.5)                                 |
| Index fractures (m) (%)                             |                                       |                                          |
| 1                                                   | 149 (78.0)                            | 150 (78.9)                               |
| 2                                                   | 33 (17.3)                             | 32 (16.8)                                |
| 3                                                   | 9 (4.7)                               | 8 (4.2)                                  |
| Estimated index fracture age (days) (median) (IQR)  | 24.5 (13.0–46.0)                      | 25.0 (14.0–56.0)                         |
| Prevalent fractures used for stratification (m) (%) |                                       |                                          |
| 1                                                   | 111 (58.1)                            | 107 (56.3)                               |
| 2                                                   | 44 (23.0)                             | 47 (24.7)                                |
| ≥3                                                  | 36 (18.8)                             | 36 (18.9)                                |
| Bisphosphonate use (m) (%) <sup>c</sup>             | 75 (39.3)                             | 65 (34.2)                                |
| Calcium use (m) (%) <sup>d</sup>                    | 106 (55.5)                            | 121 (63.7)                               |
| Vitamin D use (m) (%) <sup>e</sup>                  | 98 (51.3)                             | 109 (57.4)                               |
| Oral corticosteroid use (m) (%) <sup>f</sup>        | 21 (11.0)                             | 18 (9.5)                                 |
| Ethnicity (m) (%)                                   |                                       |                                          |
| Caucasian                                           | 178 (93.2)                            | 181 (95.3)                               |
| Hispanic                                            | 8 (4.2)                               | 2 (1.1)                                  |
| African American                                    | 3 (1.6)                               | 4 (2.1)                                  |
| Asian                                               | 1 (0.5)                               | 2 (1.1)                                  |
| Other                                               | 1 (0.5)                               | 1 (0.5)                                  |
| Smoking (m) (%)                                     |                                       |                                          |
| Never                                               | 92 (48.2)                             | 84 (44.2)                                |
| Former                                              | 68 (35.6)                             | 84 (44.2)                                |
| Current                                             | 31 (16.2)                             | 22 (11.6)                                |
| Index fracture location (m) (%)                     | n = 242                               | n = 238                                  |
| Thoracic (T5–T9)                                    | 56 (23.1)                             | 49 (20.6)                                |
| Thoracolumbar (T10–L2)                              | 143 (59.1)                            | 146 (61.3)                               |
| Lumbar (L3–L5)                                      | 43 (17.8)                             | 43 (18.1)                                |
| Opioid use (m) (%)                                  | n = 165                               | n = 169                                  |
|                                                     | 122 (73.9)                            | 126 (74.6)                               |
| T-score (m) (%)                                     | n = 165                               | n = 160                                  |
| Normal (≥ -1)                                       | 27 (16.4)                             | 27 (16.9)                                |
| Osteopenia (< -1 to ≥ -2.5)                         | 71 (43.0)                             | 71 (44.4)                                |
| Osteoporosis (< -2.5)                               | 67 (40.6)                             | 62 (38.8)                                |

**Note:**—(m) indicates numerator (No.) in category; IQR, interquartile range.

<sup>a</sup> Groups were comparable at baseline for all variables.

<sup>b</sup> Eight patients with kyphoplasty and 15 with vertebroplasty did not undergo surgery and are not included in the denominator.

<sup>c</sup> For patients using bisphosphonates, at baseline, the median time of use was 24.0 months for each group.

<sup>d</sup> For patients using calcium, at baseline, the median time of use was 42.0 and 48.0 months for each group, respectively.

<sup>e</sup> For patients using vitamin D, at baseline, the median time of use was 36.0 months for each group.

<sup>f</sup> For patients using oral corticosteroids, at baseline, the median time of use was 18.0 and 19.5 months for each group, respectively.
